# Supplementary material for: Genomic Characterization of Carbapenemase-Producing Enterobacter hormaechei, Serratia marcescens, Citrobacter freundii, Providencia stuartii and Morganella morganii Clinical Isolates from Bulgaria
Source: Preprints.org preprint supplement (doi:10.20944/preprints202404.1794.v1), 2024-04-28
Supplement: Supplementary file 1 [file supplementary]

## Sheet: Table S1. OXA mPCR
Table S1. OXA PCR components and protocol
Multiplex PCR protocol
Reagent	Stock conc	Reaction conc	Vol per 1 react [µl]	Vol for 10 reactions PCR [µl]
PCR buffer [X]	10	1	2	20		PCR setup program				Forward primer	Sequence (5'->3')	Reverse primer	Sequence (5'->3')	Size [bp]	Reference
dNTP [mM]	10	0.275	0.55	5.5		Cycles	Temperature	Time		OXA-1-like-F	TCTGTTGTTTGGGTTTCGC	OXA-1-like-R	TCTATGGTGTTTTCTATGGCTG	245	Mlynarcik et al. 2020
DFS Taq DNA Polymerase [U/ µl]	5	0.05	0.2	2			95C	4 min		OXA-2-like-F	ATTTCAAGCCAAAGGCACGA	OXA-2-like-R	GCCACTCAACCCATCCTACC	569	Mlynarcik et al. 2020
EVAgreen [X]	20	0.85	0.85	8.5		10x Touch-Down	97C	10 s		OXA-9-like-F	CTACGTGGGAATTGAAGCC	OXA-9-like-R	GTTATTGTCCCGAAGCCAG	410	Mlynarcik et al. 2020
Hydroxynaphthol blue [mM]	5	0.05	0.2	2			64-55C-TD	30 s		OXA-10-like-F	ACGGAAAGCCAAGAGCCAT	OXA-10-like-R	CCCACACCAGAAAAACCAGT	358	Mlynarcik et al. 2020
DMSO [%]	100	2.5	0.5	5			70C	60 s
OXA-1-like [µM]	10	0.3	0.6	6		20x	97C	10 s
OXA-2-like [µM]	10	0.3	0.6	6			54C	25 s
OXA-10-like [µM]	10	0.3	0.6	6			70C	45 s
OXA-9-like [µM]	10	0.4	0.8	8		Final elongation	72C	3 min
sample DNA, [ng/µl]	10÷35		1.5	15		Melting curve	72-95C
molecular grade Water			11.6	116
Reaction volume:			20	200

## Sheet: Table S2. 16S-RMTase mPCR
Table S2. 16S rRNA methyltransferase (16S RMTase) PCR components and protocol
Multiplex PCR protocol
Reagent	Stock conc	Reaction conc	Vol per 1 react [µl]	Vol for 10 reactions PCR [µl]
PCR buffer [X]	10	1	2	20		PCR setup program				Forward primer	Sequence (5'->3')	Reverse primer	Sequence (5'->3')	Size [bp]	Reference
dNTP [mM]	10	0.2	0.4	4		Cycles	Temperature	Time		ArmA-multiF	ATTTTAGATTTTGGTTGTGGC	ArmA-multiR	ATCTCAGCTCTATCAATATCG	101	Berçot 2011
DFS Taq DNA Polymerase [U/ µl]	5	0.045	0.18	1.8			95C	4 min		RmtA-multiF	AAACTATTCCGCATGGTTC	RmtA-totR	TCATGTACACAAGCTCTTTCC	88	Berçot 2011
EVAgreen [X]	20	0.85	0.85	8.5		10x Touch-Down	97C	10 s		NpmA-multi-F	GGGCTATCTAATGTGGTG	NpmA-multiR	TTTTTATTTCCGCTTCTTCGT	229	Berçot 2011
ArmA F/R [µM]	10	0.275	0.55	5.5			62-54C-TD	30 s		RmtB-multiF	ACTTTTACAATCCCTCAATAC	RmtB-multiR	AAGTATATAAGTTCTGTTCCG	171	Berçot 2011
RmtA F/R [µM]	10	0.2	0.4	4			70C	60 s		RmtC-multiF	CAGGGGTTCCAACAAGT	RmtC-multiR	AGAGTATATAGCTTGAACATAAGTAGA	246	Berçot 2011
NpmA-multi F/R [µM]	10	0.2	0.4	4		24x	97C	10 s		RmtD-multiF	GGAAAAGGACGTGGACA	RmtD-multiR	TCCATCGATTCCACAGG	171	Berçot 2011
RmtB-multi F/R [µM]	10	0.2	0.4	4			54C	30 s		rmtE-F	ATGAATATTGATGAAATGGTTGC	rmtE-R	TGATTGATTTCCTCCGTTTTTG	819	Davis 2010
RmtC-multi F/R [µM]	10	0.2	0.4	4			70C	60 s		rmtF-F	GCGATACAGAAAACCGAAGG	rmtF-R	ACCAGTCGGCATAGTGCTTT	589-1010	Hidalgo 2013
RmtD-multi F/R [µM]	10	0.2	0.4	4		Final elongation	70C	3 min
RmtE F/R [µM]	10	0.35	0.7	7		Melting curve	70-97C
RmtF F/R [µM]	10	0.15	0.3	3
sample DNA, [ng/µl]	10÷35		2	20
molecular grade Water			11.02	110.2
Reaction volume:			20	200

## Sheet: Table S3. PMQR mPCR
Table S3. Plasmid-mediated quinolone resistance (PMQR) PCR components and protocol
Multiplex PCR protocol
Reagent	Stock conc	Reaction conc	Vol per 1 react [µl]	Vol for 10 reactions PCR [µl]
PCR buffer [X]	10	1	2	20		PCR setup program				Forward primer	Sequence (5'->3')	Reverse primer	Sequence (5'->3')	Size [bp]	Reference
dNTP [mM]	2.5	0.3	2.4	24		Cycles	Temperature	Time		QnrAm-F	AGAGGATTTCTCACGCCAGG	QnrAm-R	TGCCAGGCACAGATCTTGAC	579-580	Cattoir 2007
PeqTaq Polymerase [U/ µl]	5	0.04	0.16	1.6			95C	4 min		QnrBm-F	GGMATHGAAATTCGCCACTG	QnrBm-R	TTTGCYGYYCGCCAGTCGAA	246	Cattoir 2007
EVAgreen [X]	20	0.85	0.85	8.5		9x Touch-Down	96C	20 s		qnrC-F	GGGTTGTACATTTATTGAATC	qnrC-R	TCCACTTTACGAGGTTCT	447	Wang 2009
TEA-Chloride [mM]	300	24	1.6	16			64-56C-TD	35 s		qnrDfw	CGAGATCAATTTACGGGGAATA	qnrDrev	AACAAGCTGAAGCGCCTG	582	Cavaco 2009
qnrA F/R [µM]	10	0.15	0.3	3			72C	35 s		QnrSm-F	GCAAGTTCATTGAACAGGGT	QnrSm-R	TCTAAACCGTCGAGTTCGGC	427	Cattoir 2007
qnrB F/R [µM]	10	0.5	1	10		20x	96C	20 s		QEPA-F	GCAGGTCCAGCAGCGGGTAG	QEPA-R	CTTCCTGCCCGAGTATCGTG	218	Yamane 2008
qnrC F/R [µM]	10	0.3	0.6	6			55C	35 s
qnrD F/R [µM]	10	0.15	0.3	3			72C	40 s
qnrS F/R [µM]	10	0.15	0.3	3		Final elongation	72C	3 min
qepA F/R [µM]	10	0.1	0.2	2		Melting curve	80-97C
sample DNA, [ng/µl]	10÷35		1.5	15
molecular grade Water			8.79	87.9
Reaction volume:			20	200
